# Supplementary material for: Dysregulation of cystathionine γ‐lyase promotes prostate cancer progression and metastasis
Source: PubMed Central journal article supplement (PMC6776913; doi:10.15252/embr.201845986), 2019-08-29
Supplement: EMBR-20-e45986-s001.pdf [file EMBR-20-e45986-s001.pdf]

## Appendix

### Dysregulation of cystathionine $\gamma$ -lyase promotes prostate cancer progression and metastasis

Yi-Hsiang Wang\* <sup>1, 2</sup>, Jo-Ting Huang\* <sup>1</sup>, Wen-Ling Chen<sup>1</sup>, Rrong-Hsuan Wang<sup>3</sup>

Ming-Chien Kao<sup>3</sup>, Yan-Ru Pan<sup>3</sup>, Shih-Hsuan Chan<sup>1, 2, 4</sup>, Kuo-Wang Tsai<sup>5, 6, 7</sup>,

Hsing-Jien Kung<sup>1, 8</sup>, Kai-Ti Lin<sup>1, 3, 9</sup>, and Lu-Hai Wang<sup>1, 4, 9</sup>

#### Table of Contents:

|                                                                                                                                                     |             |
|-----------------------------------------------------------------------------------------------------------------------------------------------------|-------------|
| <b>Appendix Figure S1.</b> PC3-B2, B3 cells exhibit higher bone metastatic potential than PC-T2, T3 cells.                                          | <b>2</b>    |
| <b>Appendix Figure S2.</b> H <sub>2</sub> S treatment rescues reduced p65 nuclear translocation by CTH knockdown.                                   | <b>3</b>    |
| <b>Appendix Figure S3.</b> Prostate orthotopic implantation of PC3 cells with reduced CTH expression decreases tumor growth and distant metastasis. | <b>4</b>    |
| <b>Appendix Figure S4.</b> Tube formation assay by HUVEC cells co-culturing in conditional medium from PC3-B2 cells with CTH knockdown.             | <b>5</b>    |
| <b>Appendix Table S1.</b> Primers, siRNAs, and sgRNA used in this study.                                                                            | <b>6</b>    |
| <b>Appendix Table S2.</b> Clinical data for 469 prostate cancer cases.                                                                              | <b>7-19</b> |

## Appendix Figures

### Appendix Fig S1

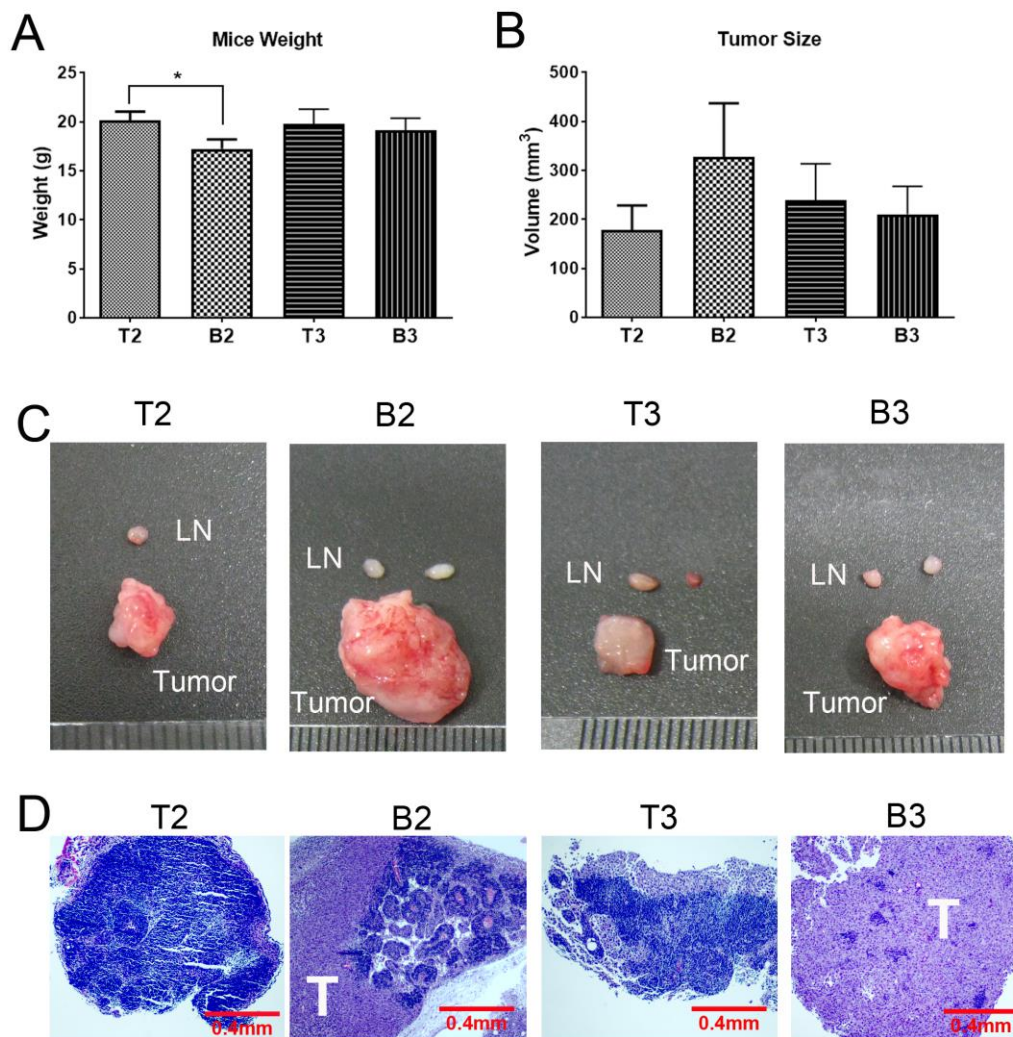

**Appendix Fig S1. PC3-B2, B3 cells exhibit higher bone metastatic potential than PC-T2, T3 cells.**  $1 \times 10^6$  PC3-T2, T3, B2, or B3 cells were orthotopically injected into mouse prostate for 15-20 days. (A-B) The mice weight (A) and the tumor volume (B) were compared. Data are presented as means  $\pm$  SEM ( $n = 6-8$  mice per group). Student's t-test was used for the statistical analysis ( $*P < 0.05$ ). (C) Images of the orthotopic xenograft tumors and paraaortic lymph nodes of mice orthotopically implanted with PC3-T2, T3, B2, or B3 cells. (D) Images show H&E staining of paraaortic lymph node sections. T: metastatic tumor cells (scale bar: 0.4mm).

## Appendix Fig S2

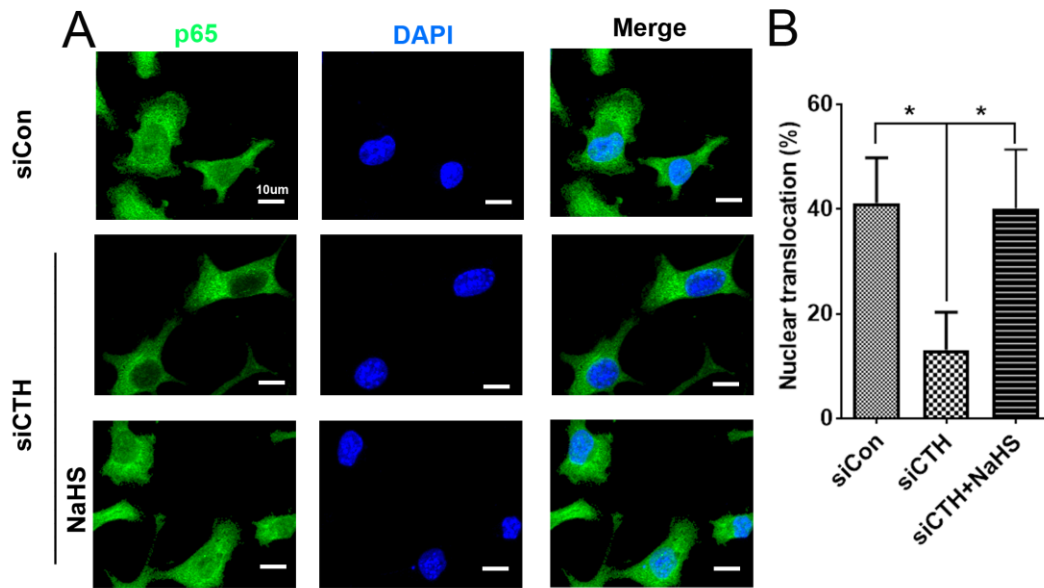

**Appendix Fig S2. H<sub>2</sub>S treatment rescues reduced p65 nuclear translocation by CTH knockdown.** (A) PC3 cells transfected with control or CTH siRNA were serum-starved overnight and then treated with 10% FBS with or without NaHS (100µM) for 1hr. Subcellular localization of p65 was detected by immunocytochemistry. Nuclei were counterstained with DAPI. The representative images are shown. Scale bars: 10µM. (B) The percent of nuclear staining for p65 was scored by counting the positive-nuclear stained cells and the total number of cells quantified in random microscopic fields. Data shown represent the means  $\pm$  SD (n=3 biological replicates). ANOVA followed by Tukey's post-hoc test was used for the statistical analysis. (\*P<0.05).

## Appendix Fig S3

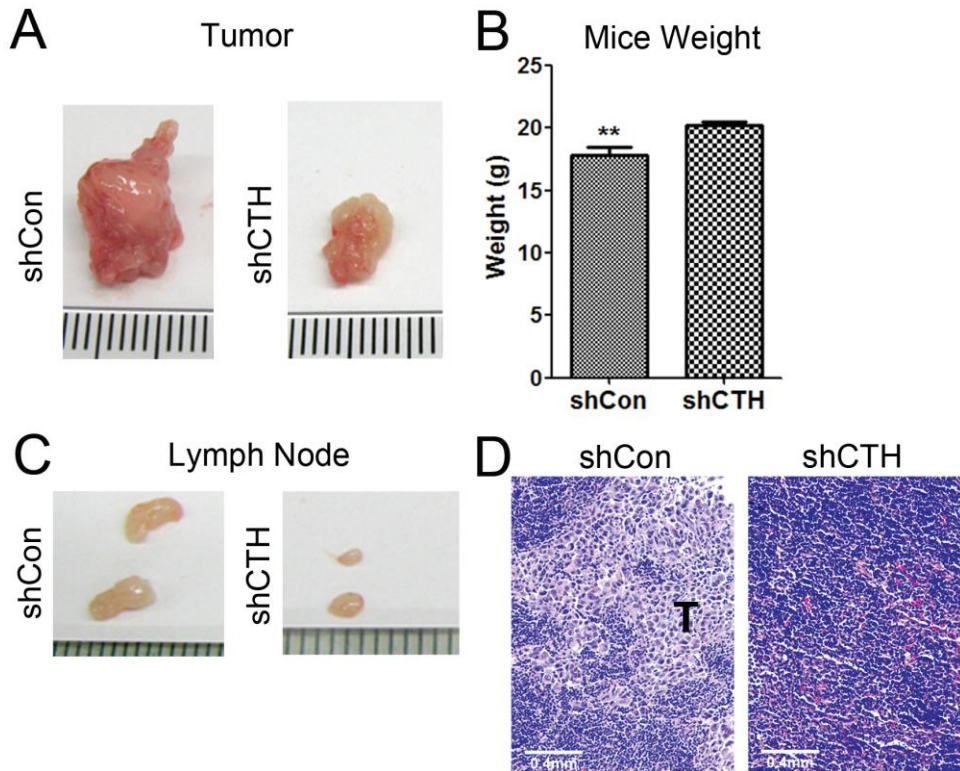

**Appendix Fig S3. Prostate orthotopic implantation of PC3 cells with reduced CTH expression decreases tumor growth and distant metastasis.**  $1 \times 10^6$  PC3 cells with control or CTH knockdown were orthotopically injected into mouse prostate for 60 days. (A) Images of PC3 xenografts (shCon or shCTH) (B) The mice weight were compared. Data are presented as means  $\pm$  SEM (n = 10 mice per group). Student's t-test was used for the statistical analysis (\*\*P<0.01). (C) Images of paraaortic lymph nodes of mice orthotopically implanted with PC3-shCon or PC3-shCTH cells. (D) Paraaortic lymph nodes of nude mice orthotopically implanted with PC3-shCon (left panel) or PC3-shCTH cells (right panel). Images show H&E staining of paraaortic lymph node sections. T: metastatic tumor cells (scale bar: 0.4mm).

Appendix Fig S4

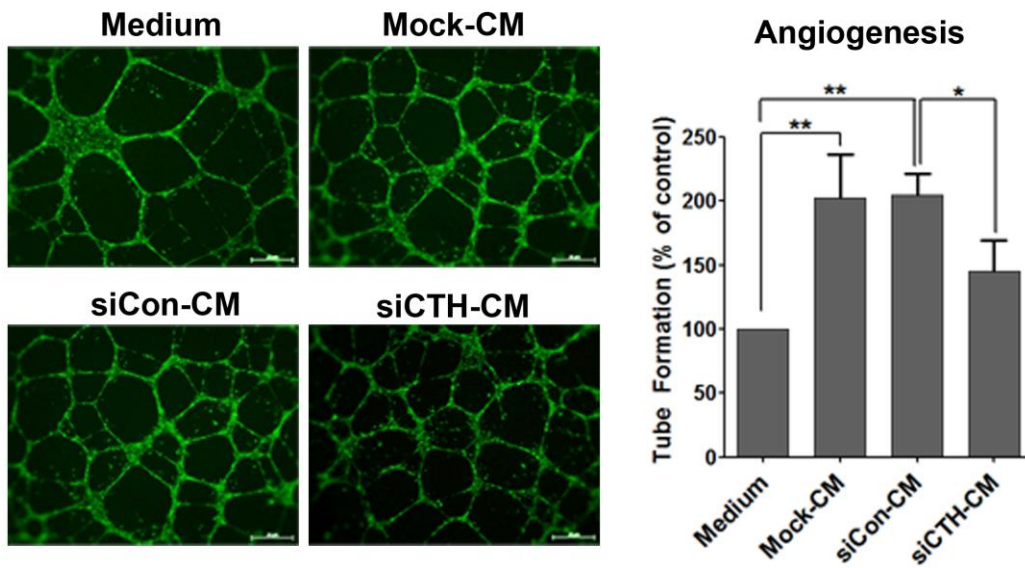

**Appendix Fig S4. Tube formation assay by HUVEC cells co-culturing in conditional medium from PC3-B2 cells with CTH knockdown.** HUVECs seeded on Matrigel and incubated with PC3-B2 derived conditional medium. Cells were photographed 16 hours after seeding, and the number of nodes formed was counted and averaged. Data shown represent the means  $\pm$  SD (n=3 biological replicates). ANOVA followed by Tukey's post-hoc test was used for the statistical analysis. (\*P<0.05; \*\*P<0.01). Representative photos are shown on the left panel.

| <b>Real-Time RT-PCR primer sequences (SYBR)</b> |                                    |                          |
|-------------------------------------------------|------------------------------------|--------------------------|
|                                                 | Forward                            | Reverse                  |
| IL1 $\beta$                                     | CTCTTCAGCCAATCTTCATT               | CCACTGTAATAAGCCATCATT    |
| VEGF                                            | CTGCTCTACCTCCACCAT                 | ATGAACTTCACCACTTCGT      |
| MMP13                                           | AAGGAGCATGGCGACTTCTA               | GGTCCTTGGAGTGGTCAAGA     |
| CTH                                             | GAAGACCTACTGGAAGAT                 | GGAATACTAGCTGTGACT       |
| RPS3                                            | CTGGAGTTGAGGTGCGAGTT               | GGCCCTTCTCACCAAGAACA     |
| actin                                           | CGGCATCGTCACCAACTG                 | TCTCAAACATGATCTGGGTCATCT |
| <b>Cloning primer sequences</b>                 |                                    |                          |
| PCDNA-CTH-F                                     | GCTAGAATTCCTTTCGCGGTTTCAGC         |                          |
| PCDNA-CTH-R                                     | ATATCTCGAGCTAGCTGTGACTTCCACTTG     |                          |
| PCDNA-p65-F                                     | ATATAAGCTTCATGGACGAACTGTTCCCC      |                          |
| PCDNA-p65-R                                     | ATATCTCGAGTTAGGAGCTGATCTGACTC      |                          |
| <b>Mutagenesis primer sequences</b>             |                                    |                          |
| p65-C38S-F                                      | TTCCGCTACAAGTCCGAGGG               |                          |
| p65-C38S-R                                      | AAGGCGATGTTTCAGGCACCC              |                          |
| p65-sgRNAresist-F                               | GGTGCAGAAAGAGGATATCGAGGTGTATTTACAG |                          |
| p65-sgRNAresist-R                               | CGTGAAATACACCTCGATATCCTCTTTCTGCACC |                          |
| CTH-Q240E-F                                     | CGTTTCTTGGAAAACCTCTCTT             |                          |
| CTH-Q240E-R                                     | AAGAGAGTTTTCCAAGAAACG              |                          |
| <b>siRNA sequence</b>                           |                                    |                          |
| CTH-1                                           | GGAGCUGAUUUUCUAUGU                 |                          |
| CTH-2                                           | CCUGGUGUCUGUAAUUGU                 |                          |
| RPS3                                            | GCAUCAAGGUGAAGAUCAU                |                          |
| <b>sgRNA sequence</b>                           |                                    |                          |
| p65 sgRNA                                       | GCTTGCGAAAAGGAGCCTCGGG             |                          |
| <b>pRFP-C-RS-shCTH sequence</b>                 |                                    |                          |
| CTH                                             | GGCTTAGAGGATGAGGAAGACCTACTGGA      |                          |

**Appendix Table S1.** Primers, siRNAs, and sgRNA used in this study.

| Patient No. | CTH (T)  | gender (T) | vital_status (T) | last_contact_days_to (T) |
|-------------|----------|------------|------------------|--------------------------|
| 1           | 254.3021 | MALE       | Alive            | 1                        |
| 2           | 346.211  | MALE       | Alive            | 1                        |
| 3           | 264.2643 | MALE       | Alive            | 9                        |
| 4           | 244.6081 | MALE       | Alive            | 22                       |
| 5           | 160.7762 | MALE       | Alive            | 23                       |
| 6           | 296.3728 | MALE       | Alive            | 24                       |
| 7           | 100.5314 | MALE       | Alive            | 27                       |
| 8           | 428.2528 | MALE       | Alive            | 28                       |
| 9           | 174.2976 | MALE       | Alive            | 29                       |
| 10          | 131.3192 | MALE       | Alive            | 29                       |
| 11          | 107.448  | MALE       | Alive            | 31                       |
| 12          | 179.2786 | MALE       | Alive            | 31                       |
| 13          | 225.8082 | MALE       | Alive            | 31                       |
| 14          | 268.1401 | MALE       | Alive            | 31                       |
| 15          | 312.7435 | MALE       | Alive            | 32                       |
| 16          | 118.8392 | MALE       | Alive            | 32                       |
| 17          | 187.3434 | MALE       | Alive            | 34                       |
| 18          | 82.6625  | MALE       | Alive            | 34                       |
| 19          | 174.8289 | MALE       | Alive            | 34                       |
| 20          | 121.1765 | MALE       | Alive            | 35                       |
| 21          | 91.2017  | MALE       | Alive            | 38                       |
| 22          | 185.6869 | MALE       | Alive            | 41                       |
| 23          | 204.4135 | MALE       | Alive            | 41                       |
| 24          | 205.5866 | MALE       | Alive            | 42                       |
| 25          | 199.9834 | MALE       | Alive            | 44                       |
| 26          | 184.9372 | MALE       | Alive            | 44                       |
| 27          | 204.2904 | MALE       | Alive            | 45                       |
| 28          | 82.5726  | MALE       | Alive            | 46                       |
| 29          | 165.1201 | MALE       | Alive            | 48                       |
| 30          | 133.8726 | MALE       | Alive            | 49                       |
| 31          | 198.1154 | MALE       | Alive            | 50                       |
| 32          | 236.892  | MALE       | Alive            | 51                       |
| 33          | 202.3627 | MALE       | Alive            | 51                       |
| 34          | 284.4805 | MALE       | Alive            | 52                       |
| 35          | 142.4382 | MALE       | Alive            | 52                       |

|    |          |      |       |    |
|----|----------|------|-------|----|
| 36 | 124.1554 | MALE | Alive | 53 |
| 37 | 109.992  | MALE | Alive | 54 |
| 38 | 264.1869 | MALE | Alive | 54 |
| 39 | 104.707  | MALE | Alive | 54 |
| 40 | 183.7183 | MALE | Alive | 56 |
| 41 | 209.5041 | MALE | Alive | 57 |
| 42 | 213.7712 | MALE | Alive | 60 |
| 43 | 127.8317 | MALE | Alive | 60 |
| 44 | 97.5783  | MALE | Alive | 60 |
| 45 | 112.3376 | MALE | Alive | 61 |
| 46 | 70.5538  | MALE | Alive | 62 |
| 47 | 192.4306 | MALE | Alive | 62 |
| 48 | 165.3055 | MALE | Alive | 62 |
| 49 | 160.0982 | MALE | Alive | 62 |
| 50 | 193.6124 | MALE | Alive | 62 |
| 51 | 131.1842 | MALE | Alive | 63 |
| 52 | 214.9357 | MALE | Alive | 63 |
| 53 | 179.8616 | MALE | Alive | 64 |
| 54 | 188.7694 | MALE | Alive | 66 |
| 55 | 89.3973  | MALE | Alive | 67 |
| 56 | 125      | MALE | Alive | 68 |
| 57 | 109.1196 | MALE | Alive | 70 |
| 58 | 98.0575  | MALE | Alive | 70 |
| 59 | 238.9468 | MALE | Alive | 70 |
| 60 | 96.3391  | MALE | Alive | 71 |
| 61 | 144.6261 | MALE | Alive | 72 |
| 62 | 204.8742 | MALE | Alive | 76 |
| 63 | 184.9926 | MALE | Alive | 77 |
| 64 | 236.2149 | MALE | Alive | 79 |
| 65 | 291.5746 | MALE | Alive | 81 |
| 66 | 197.7492 | MALE | Alive | 82 |
| 67 | 257.5198 | MALE | Alive | 83 |
| 68 | 129.1161 | MALE | Alive | 86 |
| 69 | 202.1637 | MALE | Alive | 89 |
| 70 | 283.6308 | MALE | Alive | 91 |
| 71 | 234.3626 | MALE | Alive | 91 |
| 72 | 125.9164 | MALE | Alive | 91 |



|     |          |      |       |     |
|-----|----------|------|-------|-----|
| 73  | 124.6471 | MALE | Alive | 91  |
| 74  | 162.5222 | MALE | Alive | 91  |
| 75  | 376.6441 | MALE | Alive | 91  |
| 76  | 219.5652 | MALE | Alive | 93  |
| 77  | 228.1414 | MALE | Alive | 95  |
| 78  | 70.0062  | MALE | Alive | 96  |
| 79  | 81.3008  | MALE | Alive | 97  |
| 80  | 167.7439 | MALE | Alive | 98  |
| 81  | 224.1435 | MALE | Alive | 101 |
| 82  | 201.2443 | MALE | Alive | 102 |
| 83  | 75.488   | MALE | Alive | 104 |
| 84  | 211.9018 | MALE | Alive | 106 |
| 85  | 136.3997 | MALE | Alive | 106 |
| 86  | 156.0491 | MALE | Alive | 110 |
| 87  | 178.7611 | MALE | Alive | 112 |
| 88  | 125.605  | MALE | Alive | 112 |
| 89  | 146.4336 | MALE | Alive | 112 |
| 90  | 199.6248 | MALE | Alive | 113 |
| 91  | 231.4669 | MALE | Alive | 114 |
| 92  | 109.0556 | MALE | Alive | 115 |
| 93  | 133.3383 | MALE | Alive | 117 |
| 94  | 183.4962 | MALE | Alive | 119 |
| 95  | 133.4263 | MALE | Alive | 121 |
| 96  | 145.2213 | MALE | Alive | 122 |
| 97  | 161.7397 | MALE | Alive | 123 |
| 98  | 78.2504  | MALE | Alive | 126 |
| 99  | 144.3159 | MALE | Alive | 128 |
| 100 | 187.6457 | MALE | Alive | 129 |
| 101 | 31.2734  | MALE | Alive | 131 |
| 102 | 256.861  | MALE | Alive | 132 |
| 103 | 149.5465 | MALE | Alive | 132 |
| 104 | 134.2505 | MALE | Alive | 134 |
| 105 | 65.4321  | MALE | Alive | 134 |
| 106 | 195.6615 | MALE | Alive | 145 |
| 107 | 158.2734 | MALE | Alive | 148 |
| 108 | 246.4247 | MALE | Alive | 149 |
| 109 | 162.2696 | MALE | Alive | 150 |

|     |          |      |       |     |
|-----|----------|------|-------|-----|
| 110 | 180.9211 | MALE | Alive | 150 |
| 111 | 225.9578 | MALE | Alive | 156 |
| 112 | 162.5644 | MALE | Alive | 158 |
| 113 | 154.8747 | MALE | Alive | 162 |
| 114 | 123.4136 | MALE | Alive | 162 |
| 115 | 170.1733 | MALE | Alive | 167 |
| 116 | 99.9653  | MALE | Alive | 167 |
| 117 | 170.3171 | MALE | Alive | 169 |
| 118 | 126.4098 | MALE | Alive | 170 |
| 119 | 127.9903 | MALE | Alive | 170 |
| 120 | 168.2809 | MALE | Alive | 172 |
| 121 | 166.6285 | MALE | Alive | 172 |
| 122 | 142.4837 | MALE | Alive | 173 |
| 123 | 221.9186 | MALE | Alive | 175 |
| 124 | 184.2155 | MALE | Alive | 176 |
| 125 | 114.8126 | MALE | Alive | 177 |
| 126 | 77.8286  | MALE | Alive | 178 |
| 127 | 232.9076 | MALE | Alive | 182 |
| 128 | 234.0922 | MALE | Alive | 183 |
| 129 | 158.9546 | MALE | Alive | 183 |
| 130 | 133.0449 | MALE | Alive | 187 |
| 131 | 158.7105 | MALE | Alive | 187 |
| 132 | 174.2059 | MALE | Alive | 191 |
| 133 | 110.07   | MALE | Alive | 196 |
| 134 | 216.4024 | MALE | Alive | 196 |
| 135 | 196.2474 | MALE | Alive | 197 |
| 136 | 188.4647 | MALE | Alive | 202 |
| 137 | 187.6862 | MALE | Alive | 203 |
| 138 | 230.3945 | MALE | Alive | 204 |
| 139 | 166.442  | MALE | Alive | 204 |
| 140 | 184.3736 | MALE | Alive | 206 |
| 141 | 191.248  | MALE | Alive | 211 |
| 142 | 215.7429 | MALE | Alive | 212 |
| 143 | 206.9623 | MALE | Alive | 213 |
| 144 | 92.1848  | MALE | Alive | 213 |
| 145 | 235.8452 | MALE | Alive | 216 |
| 146 | 198.4474 | MALE | Alive | 216 |

|     |          |      |       |     |
|-----|----------|------|-------|-----|
| 147 | 161.1857 | MALE | Alive | 217 |
| 148 | 46.1341  | MALE | Alive | 223 |
| 149 | 152.691  | MALE | Alive | 229 |
| 150 | 74.7619  | MALE | Alive | 229 |
| 151 | 150.4124 | MALE | Alive | 230 |
| 152 | 258.1602 | MALE | Alive | 233 |
| 153 | 89.3742  | MALE | Alive | 244 |
| 154 | 166.5988 | MALE | Alive | 245 |
| 155 | 221.3302 | MALE | Alive | 249 |
| 156 | 118.2409 | MALE | Alive | 256 |
| 157 | 195.9478 | MALE | Alive | 259 |
| 158 | 67.7849  | MALE | Alive | 261 |
| 159 | 108.1844 | MALE | Alive | 263 |
| 160 | 179.825  | MALE | Alive | 264 |
| 161 | 77.5862  | MALE | Alive | 269 |
| 162 | 116.1731 | MALE | Alive | 270 |
| 163 | 330.0377 | MALE | Alive | 273 |
| 164 | 177.1859 | MALE | Alive | 278 |
| 165 | 126.5732 | MALE | Alive | 279 |
| 166 | 188.7415 | MALE | Alive | 279 |
| 167 | 200.307  | MALE | Alive | 285 |
| 168 | 238.6844 | MALE | Alive | 285 |
| 169 | 132.5148 | MALE | Alive | 287 |
| 170 | 171.9653 | MALE | Alive | 289 |
| 171 | 109.529  | MALE | Alive | 290 |
| 172 | 148.8398 | MALE | Alive | 295 |
| 173 | 200.4853 | MALE | Alive | 295 |
| 174 | 115.7663 | MALE | Alive | 295 |
| 175 | 147.9132 | MALE | Alive | 295 |
| 176 | 62.8364  | MALE | Alive | 299 |
| 177 | 149.4208 | MALE | Alive | 302 |
| 178 | 162.5509 | MALE | Alive | 304 |
| 179 | 157.767  | MALE | Alive | 308 |
| 180 | 189.5593 | MALE | Alive | 310 |
| 181 | 227.5892 | MALE | Alive | 314 |
| 182 | 194.7566 | MALE | Alive | 316 |
| 183 | 165.3272 | MALE | Alive | 321 |

|     |          |      |       |     |
|-----|----------|------|-------|-----|
| 184 | 82.766   | MALE | Alive | 324 |
| 185 | 328.1899 | MALE | Alive | 350 |
| 186 | 59.7661  | MALE | Alive | 350 |
| 187 | 97.057   | MALE | Alive | 352 |
| 188 | 192.4623 | MALE | Alive | 353 |
| 189 | 169.1437 | MALE | Alive | 356 |
| 190 | 181.4103 | MALE | Alive | 356 |
| 191 | 171.1027 | MALE | Alive | 358 |
| 192 | 158.4706 | MALE | Alive | 365 |
| 193 | 260.2802 | MALE | Alive | 371 |
| 194 | 51.6579  | MALE | Alive | 386 |
| 195 | 169.3792 | MALE | Alive | 390 |
| 196 | 96.1721  | MALE | Alive | 393 |
| 197 | 90.7372  | MALE | Alive | 394 |
| 198 | 210.9323 | MALE | Alive | 395 |
| 199 | 258.1674 | MALE | Alive | 396 |
| 200 | 146.1325 | MALE | Alive | 396 |
| 201 | 163.6967 | MALE | Alive | 397 |
| 202 | 109.8655 | MALE | Alive | 405 |
| 203 | 228.1298 | MALE | Alive | 405 |
| 204 | 104.2506 | MALE | Alive | 405 |
| 205 | 236.7455 | MALE | Alive | 412 |
| 206 | 121.0124 | MALE | Alive | 417 |
| 207 | 130.6598 | MALE | Alive | 422 |
| 208 | 105.2813 | MALE | Alive | 425 |
| 209 | 56.0803  | MALE | Alive | 427 |
| 210 | 84.0841  | MALE | Alive | 428 |
| 211 | 145.5236 | MALE | Alive | 437 |
| 212 | 210.5342 | MALE | Alive | 448 |
| 213 | 253.9286 | MALE | Alive | 448 |
| 214 | 171.8728 | MALE | Alive | 452 |
| 215 | 95.0081  | MALE | Alive | 454 |
| 216 | 177.3227 | MALE | Alive | 457 |
| 217 | 254.8726 | MALE | Alive | 458 |
| 218 | 131.8066 | MALE | Alive | 459 |
| 219 | 90.6103  | MALE | Alive | 463 |
| 220 | 231.4022 | MALE | Alive | 474 |

|     |          |      |       |     |
|-----|----------|------|-------|-----|
| 221 | 239.7396 | MALE | Alive | 476 |
| 222 | 48.5372  | MALE | Alive | 476 |
| 223 | 176.572  | MALE | Alive | 481 |
| 224 | 134.9907 | MALE | Alive | 483 |
| 225 | 264.4628 | MALE | Alive | 485 |
| 226 | 260.0791 | MALE | Alive | 486 |
| 227 | 100.7943 | MALE | Alive | 487 |
| 228 | 98.6409  | MALE | Alive | 488 |
| 229 | 97.3947  | MALE | Alive | 491 |
| 230 | 26.455   | MALE | Alive | 503 |
| 231 | 184.1764 | MALE | Alive | 505 |
| 232 | 195.1804 | MALE | Alive | 508 |
| 233 | 153.8741 | MALE | Alive | 510 |
| 234 | 122.0845 | MALE | Alive | 512 |
| 235 | 139.8573 | MALE | Alive | 512 |
| 236 | 173.0449 | MALE | Alive | 518 |
| 237 | 125.5622 | MALE | Alive | 518 |
| 238 | 196.7825 | MALE | Alive | 519 |
| 239 | 118.8707 | MALE | Alive | 523 |
| 240 | 142.288  | MALE | Alive | 524 |
| 241 | 166.1775 | MALE | Alive | 526 |
| 242 | 143.932  | MALE | Alive | 526 |
| 243 | 159.5745 | MALE | Alive | 528 |
| 244 | 198.8124 | MALE | Alive | 530 |
| 245 | 171.4643 | MALE | Alive | 533 |
| 246 | 178.6618 | MALE | Alive | 533 |
| 247 | 77.0877  | MALE | Alive | 536 |
| 248 | 196.6774 | MALE | Alive | 537 |
| 249 | 212.968  | MALE | Alive | 542 |
| 250 | 84.7657  | MALE | Alive | 549 |
| 251 | 166.0526 | MALE | Alive | 554 |
| 252 | 107.139  | MALE | Alive | 560 |
| 253 | 214.8303 | MALE | Alive | 567 |
| 254 | 49.7716  | MALE | Alive | 570 |
| 255 | 198.4405 | MALE | Alive | 589 |
| 256 | 238.0268 | MALE | Alive | 595 |
| 257 | 244.4334 | MALE | Alive | 598 |

|     |          |      |       |     |
|-----|----------|------|-------|-----|
| 258 | 30.4248  | MALE | Alive | 602 |
| 259 | 148.7965 | MALE | Alive | 606 |
| 260 | 183.6926 | MALE | Alive | 614 |
| 261 | 154.0415 | MALE | Alive | 615 |
| 262 | 342.9454 | MALE | Alive | 621 |
| 263 | 68.3024  | MALE | Alive | 624 |
| 264 | 125      | MALE | Alive | 636 |
| 265 | 128.1573 | MALE | Alive | 637 |
| 266 | 193.6275 | MALE | Alive | 643 |
| 267 | 168.5393 | MALE | Alive | 655 |
| 268 | 149.1491 | MALE | Alive | 662 |
| 269 | 208.482  | MALE | Alive | 663 |
| 270 | 234.1311 | MALE | Alive | 663 |
| 271 | 162.4185 | MALE | Alive | 664 |
| 272 | 177.2632 | MALE | Alive | 664 |
| 273 | 191.3818 | MALE | Alive | 665 |
| 274 | 185.7143 | MALE | Alive | 668 |
| 275 | 140.3107 | MALE | Alive | 668 |
| 276 | 209.8569 | MALE | Alive | 671 |
| 277 | 138.8399 | MALE | Alive | 671 |
| 278 | 219.8834 | MALE | Alive | 674 |
| 279 | 96.8222  | MALE | Alive | 686 |
| 280 | 192.623  | MALE | Alive | 692 |
| 281 | 97.2654  | MALE | Alive | 692 |
| 282 | 117.5337 | MALE | Alive | 693 |
| 283 | 302.3093 | MALE | Alive | 700 |
| 284 | 69.8599  | MALE | Alive | 709 |
| 285 | 118.2864 | MALE | Alive | 717 |
| 286 | 96.3145  | MALE | Alive | 721 |
| 287 | 204.6465 | MALE | Alive | 724 |
| 288 | 173.0808 | MALE | Alive | 724 |
| 289 | 208.6173 | MALE | Alive | 729 |
| 290 | 225.1472 | MALE | Alive | 731 |
| 291 | 212.2025 | MALE | Alive | 731 |
| 292 | 131.6407 | MALE | Alive | 738 |
| 293 | 113.1145 | MALE | Alive | 740 |
| 294 | 109.4359 | MALE | Alive | 756 |

|     |          |      |       |     |
|-----|----------|------|-------|-----|
| 295 | 145.2442 | MALE | Alive | 757 |
| 296 | 198.9531 | MALE | Alive | 762 |
| 297 | 84.2154  | MALE | Alive | 770 |
| 298 | 241.2595 | MALE | Alive | 771 |
| 299 | 145.9016 | MALE | Alive | 774 |
| 300 | 258.3371 | MALE | Alive | 775 |
| 301 | 157.5071 | MALE | Alive | 782 |
| 302 | 234.217  | MALE | Alive | 783 |
| 303 | 260.0685 | MALE | Alive | 788 |
| 304 | 406.588  | MALE | Alive | 790 |
| 305 | 84.118   | MALE | Alive | 790 |
| 306 | 127.3366 | MALE | Alive | 798 |
| 307 | 159.0816 | MALE | Alive | 804 |
| 308 | 173.6876 | MALE | Alive | 804 |
| 309 | 202.5547 | MALE | Alive | 805 |
| 310 | 143.5644 | MALE | Alive | 806 |
| 311 | 142.993  | MALE | Alive | 821 |
| 312 | 339.8268 | MALE | Alive | 821 |
| 313 | 135.718  | MALE | Alive | 822 |
| 314 | 163.5323 | MALE | Alive | 822 |
| 315 | 193.144  | MALE | Alive | 822 |
| 316 | 333.9401 | MALE | Alive | 824 |
| 317 | 141.2893 | MALE | Alive | 834 |
| 318 | 84.2427  | MALE | Alive | 840 |
| 319 | 209.1272 | MALE | Alive | 841 |
| 320 | 119.6411 | MALE | Alive | 846 |
| 321 | 130.6865 | MALE | Alive | 846 |
| 322 | 216.9395 | MALE | Alive | 850 |
| 323 | 126.6365 | MALE | Alive | 851 |
| 324 | 160.4301 | MALE | Alive | 854 |
| 325 | 150.2003 | MALE | Alive | 857 |
| 326 | 264.1068 | MALE | Alive | 868 |
| 327 | 144.4405 | MALE | Alive | 875 |
| 328 | 174.2892 | MALE | Alive | 882 |
| 329 | 138.427  | MALE | Alive | 889 |
| 330 | 81.0664  | MALE | Alive | 913 |
| 331 | 206.4705 | MALE | Alive | 917 |

|     |          |      |       |      |
|-----|----------|------|-------|------|
| 332 | 197.6927 | MALE | Alive | 922  |
| 333 | 115.9651 | MALE | Alive | 923  |
| 334 | 207.3245 | MALE | Alive | 926  |
| 335 | 193.6049 | MALE | Alive | 930  |
| 336 | 106.8085 | MALE | Alive | 934  |
| 337 | 146.0348 | MALE | Alive | 943  |
| 338 | 137.3414 | MALE | Alive | 958  |
| 339 | 181.8497 | MALE | Alive | 972  |
| 340 | 165.874  | MALE | Alive | 972  |
| 341 | 194.7515 | MALE | Alive | 974  |
| 342 | 145.7555 | MALE | Alive | 986  |
| 343 | 173.6896 | MALE | Alive | 993  |
| 344 | 178.6765 | MALE | Alive | 995  |
| 345 | 97.3016  | MALE | Alive | 999  |
| 346 | 106.2048 | MALE | Alive | 1000 |
| 347 | 206.3348 | MALE | Alive | 1001 |
| 348 | 187.4911 | MALE | Alive | 1004 |
| 349 | 141.2982 | MALE | Alive | 1008 |
| 350 | 195.4023 | MALE | Alive | 1014 |
| 351 | 147.2031 | MALE | Alive | 1019 |
| 352 | 222.6981 | MALE | Alive | 1033 |
| 353 | 162.0016 | MALE | Alive | 1049 |
| 354 | 55.2036  | MALE | Alive | 1054 |
| 355 | 229.3982 | MALE | Alive | 1061 |
| 356 | 152.1291 | MALE | Alive | 1063 |
| 357 | 250.2596 | MALE | Alive | 1065 |
| 358 | 171.4774 | MALE | Alive | 1102 |
| 359 | 215.502  | MALE | Alive | 1108 |
| 360 | 337.0056 | MALE | Alive | 1109 |
| 361 | 137.1974 | MALE | Alive | 1117 |
| 362 | 207.2109 | MALE | Alive | 1124 |
| 363 | 158.4343 | MALE | Alive | 1126 |
| 364 | 115.7294 | MALE | Alive | 1131 |
| 365 | 126.4874 | MALE | Alive | 1147 |
| 366 | 115.7025 | MALE | Alive | 1153 |
| 367 | 90.9879  | MALE | Alive | 1155 |
| 368 | 159.6391 | MALE | Alive | 1157 |



|     |          |      |       |      |
|-----|----------|------|-------|------|
| 369 | 153.618  | MALE | Alive | 1164 |
| 370 | 231.7687 | MALE | Alive | 1173 |
| 371 | 224.6466 | MALE | Alive | 1184 |
| 372 | 266.3062 | MALE | Alive | 1195 |
| 373 | 196.3282 | MALE | Alive | 1206 |
| 374 | 176.3433 | MALE | Alive | 1215 |
| 375 | 173.8038 | MALE | Alive | 1230 |
| 376 | 250.838  | MALE | Alive | 1237 |
| 377 | 55.8227  | MALE | Alive | 1247 |
| 378 | 177.4682 | MALE | Alive | 1253 |
| 379 | 144.9838 | MALE | Alive | 1254 |
| 380 | 347.7619 | MALE | Alive | 1259 |
| 381 | 159.2357 | MALE | Alive | 1261 |
| 382 | 168.5363 | MALE | Alive | 1272 |
| 383 | 174.2138 | MALE | Alive | 1280 |
| 384 | 177.3952 | MALE | Alive | 1296 |
| 385 | 118.8487 | MALE | Alive | 1328 |
| 386 | 140.8998 | MALE | Alive | 1332 |
| 387 | 188.5559 | MALE | Alive | 1338 |
| 388 | 154.3917 | MALE | Alive | 1339 |
| 389 | 131.654  | MALE | Alive | 1349 |
| 390 | 98.298   | MALE | Alive | 1359 |
| 391 | 179.4654 | MALE | Alive | 1373 |
| 392 | 234.375  | MALE | Alive | 1375 |
| 393 | 192.1732 | MALE | Alive | 1384 |
| 394 | 187.6462 | MALE | Alive | 1386 |
| 395 | 64.2471  | MALE | Alive | 1393 |
| 396 | 134.6824 | MALE | Alive | 1395 |
| 397 | 135.738  | MALE | Alive | 1399 |
| 398 | 164.559  | MALE | Alive | 1438 |
| 399 | 154.5548 | MALE | Alive | 1441 |
| 400 | 190.8084 | MALE | Alive | 1442 |
| 401 | 106.1125 | MALE | Alive | 1461 |
| 402 | 237.5829 | MALE | Alive | 1491 |
| 403 | 162.7998 | MALE | Alive | 1491 |
| 404 | 177.6225 | MALE | Alive | 1498 |
| 405 | 170.0796 | MALE | Alive | 1501 |

|     |          |      |       |      |
|-----|----------|------|-------|------|
| 406 | 194.1568 | MALE | Alive | 1518 |
| 407 | 180.2735 | MALE | Alive | 1559 |
| 408 | 168.8022 | MALE | Alive | 1563 |
| 409 | 93.6849  | MALE | Alive | 1572 |
| 410 | 178.3354 | MALE | Alive | 1608 |
| 411 | 109.2991 | MALE | Alive | 1611 |
| 412 | 142.9655 | MALE | Alive | 1621 |
| 413 | 223.7106 | MALE | Alive | 1635 |
| 414 | 98.6141  | MALE | Alive | 1649 |
| 415 | 108.7585 | MALE | Alive | 1659 |
| 416 | 220.5641 | MALE | Alive | 1669 |
| 417 | 212.9838 | MALE | Alive | 1690 |
| 418 | 48.4373  | MALE | Alive | 1718 |
| 419 | 212.2736 | MALE | Alive | 1770 |
| 420 | 79.7353  | MALE | Alive | 1776 |
| 421 | 64.8314  | MALE | Alive | 1776 |
| 422 | 240.2288 | MALE | Alive | 1815 |
| 423 | 233.2083 | MALE | Alive | 1842 |
| 424 | 186.3231 | MALE | Alive | 1853 |
| 425 | 149.022  | MALE | Alive | 1860 |
| 426 | 56.7787  | MALE | Alive | 1879 |
| 427 | 209.8248 | MALE | Alive | 1890 |
| 428 | 107.0703 | MALE | Alive | 1891 |
| 429 | 147.7585 | MALE | Alive | 1897 |
| 430 | 111.4447 | MALE | Alive | 1925 |
| 431 | 146.7033 | MALE | Alive | 1943 |
| 432 | 139.9257 | MALE | Alive | 1946 |
| 433 | 85.6134  | MALE | Alive | 1949 |
| 434 | 123.6897 | MALE | Alive | 1961 |
| 435 | 283.3798 | MALE | Alive | 1973 |
| 436 | 187.8006 | MALE | Alive | 2037 |
| 437 | 51.4113  | MALE | Alive | 2040 |
| 438 | 177.3103 | MALE | Alive | 2051 |
| 439 | 72.9589  | MALE | Alive | 2056 |
| 440 | 46.5208  | MALE | Alive | 2068 |
| 441 | 174.7652 | MALE | Alive | 2110 |
| 442 | 194.2446 | MALE | Alive | 2170 |

|     |          |      |       |      |
|-----|----------|------|-------|------|
| 443 | 127.9676 | MALE | Alive | 2183 |
| 444 | 118.2266 | MALE | Alive | 2211 |
| 445 | 165.5481 | MALE | Alive | 2309 |
| 446 | 131.4128 | MALE | Alive | 2315 |
| 447 | 163.7401 | MALE | Alive | 2328 |
| 448 | 297.6721 | MALE | Alive | 2364 |
| 449 | 136.0025 | MALE | Alive | 2425 |
| 450 | 269.0698 | MALE | Alive | 2542 |
| 451 | 139.5724 | MALE | Alive | 2553 |
| 452 | 167.5353 | MALE | Alive | 2576 |
| 453 | 148.314  | MALE | Alive | 2620 |
| 454 | 128.0851 | MALE | Alive | 2704 |
| 455 | 74.8384  | MALE | Alive | 2753 |
| 456 | 183.3741 | MALE | Alive | 2859 |
| 457 | 148.2667 | MALE | Alive | 3247 |
| 458 | 157.1364 | MALE | Alive | 3447 |
| 459 | 100.0547 | MALE | Alive | 3487 |
| 460 | 196.5959 | MALE | Alive | 3524 |
| 461 | 142.7429 | MALE | Alive | 4604 |
| 462 | 187.0794 | MALE | Dead  | 628  |
| 463 | 153.4058 | MALE | Dead  | 728  |
| 464 | 289.8361 | MALE | Dead  | 791  |
| 465 | 183.1073 | MALE | Dead  | 1329 |
| 466 | 186.3643 | MALE | Dead  | 1855 |
| 467 | 172.3044 | MALE | Dead  | 875  |
| 468 | 195.0005 | MALE | Dead  | 146  |
| 469 | 151.8738 | MALE | Dead  | 3467 |

**Appendix Table S2.** Clinical data for 469 prostate cancer cases.
