# Supplementary material for: Dysregulation of cystathionine γ‐lyase promotes prostate cancer progression and metastasis
Source: PubMed Central journal article supplement (PMC6776913; doi:10.15252/embr.201845986), 2019-08-29

Figure 2A

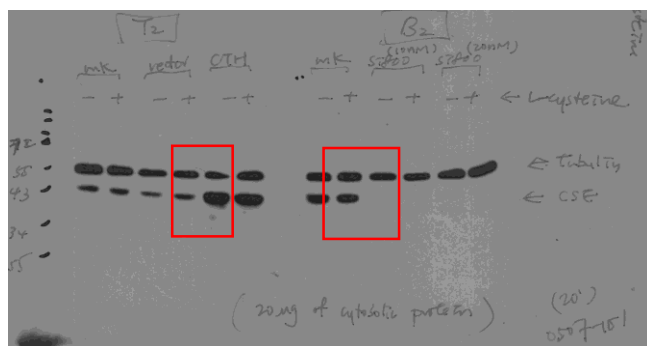

Figure 2E

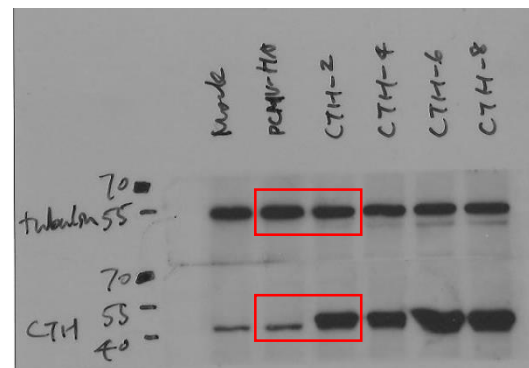

Supplement: EMBR-20-e45986-s004.pdf [file EMBR-20-e45986-s004.pdf]
